# Supplementary material for: A Descriptive Study of 103 Primary Cutaneous B-cell Lymphomas: Clinical and Pathological Characteristics and Treatment from the Spanish Lymphoma Oncology Group (Gotel)
Source: Preprints.org preprint supplement (doi:10.20944/preprints202402.0830.v1), 2024-02-15
Supplement: Supplementary file 1 [file supplementary]

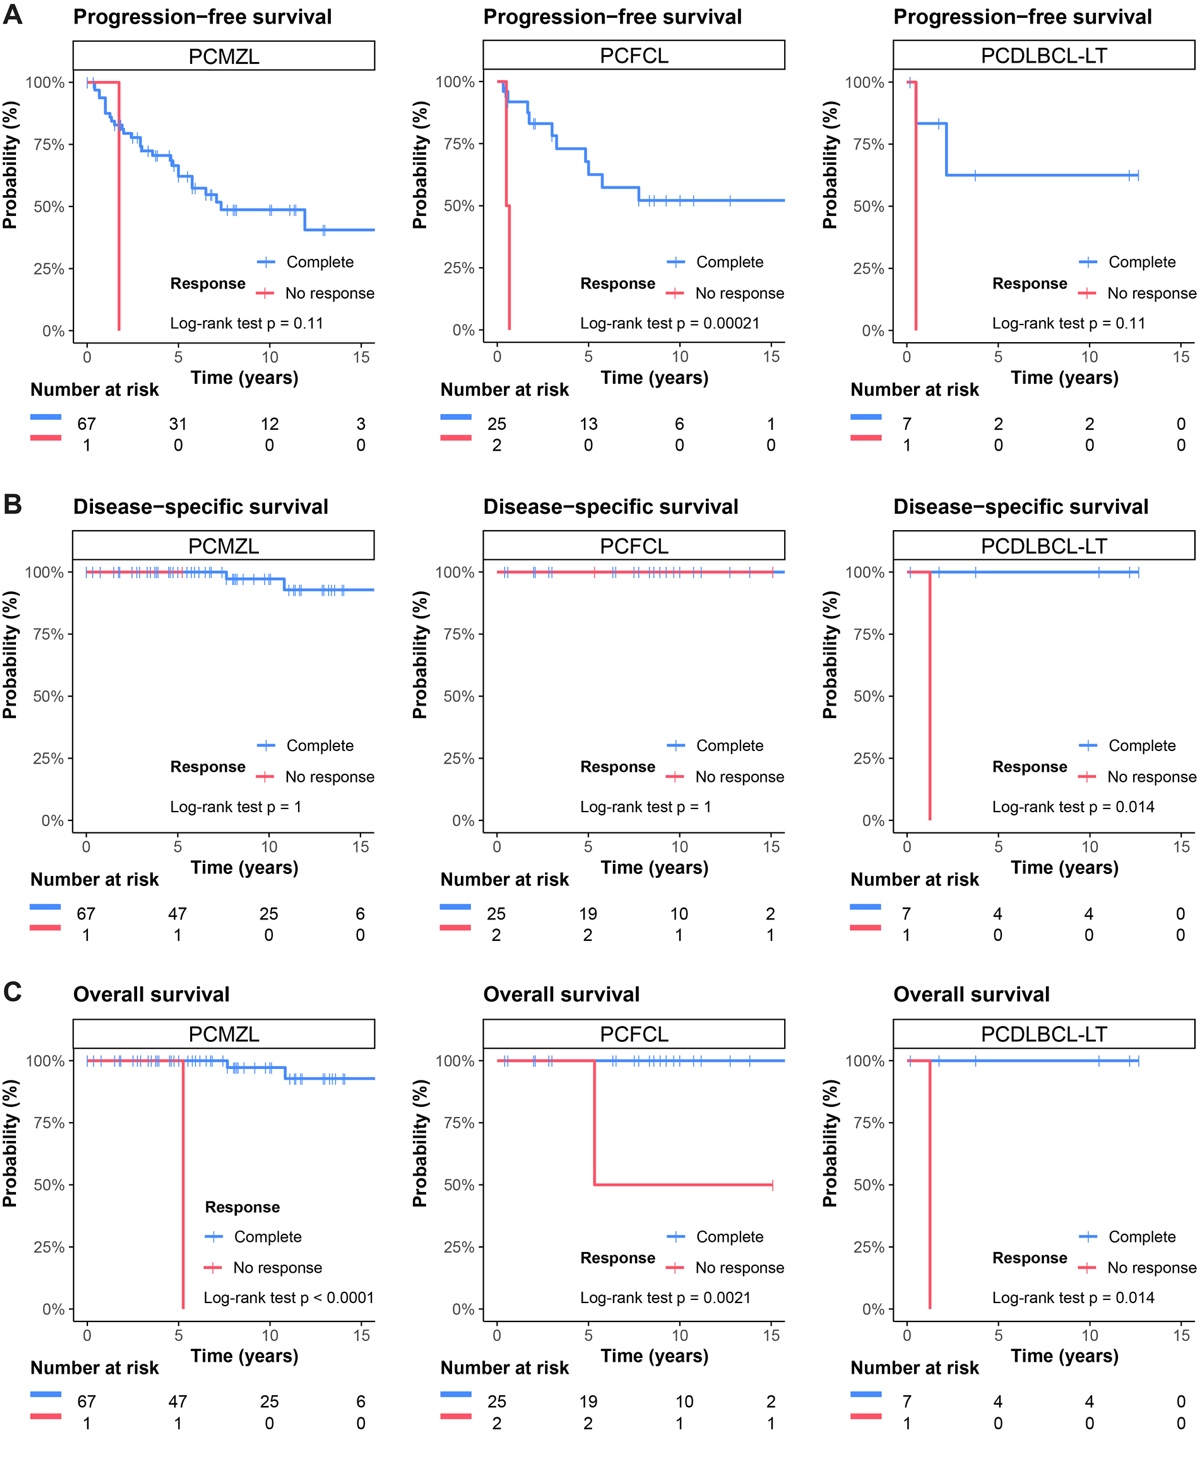
**Supplementary Materials:**

**Figure S1**: Kaplan‒Meier survival curves according to tumour histology (columnwise) and clinical response. **A**, progression-free survival; **B**, disease-specific survival; **C**, overall survival.


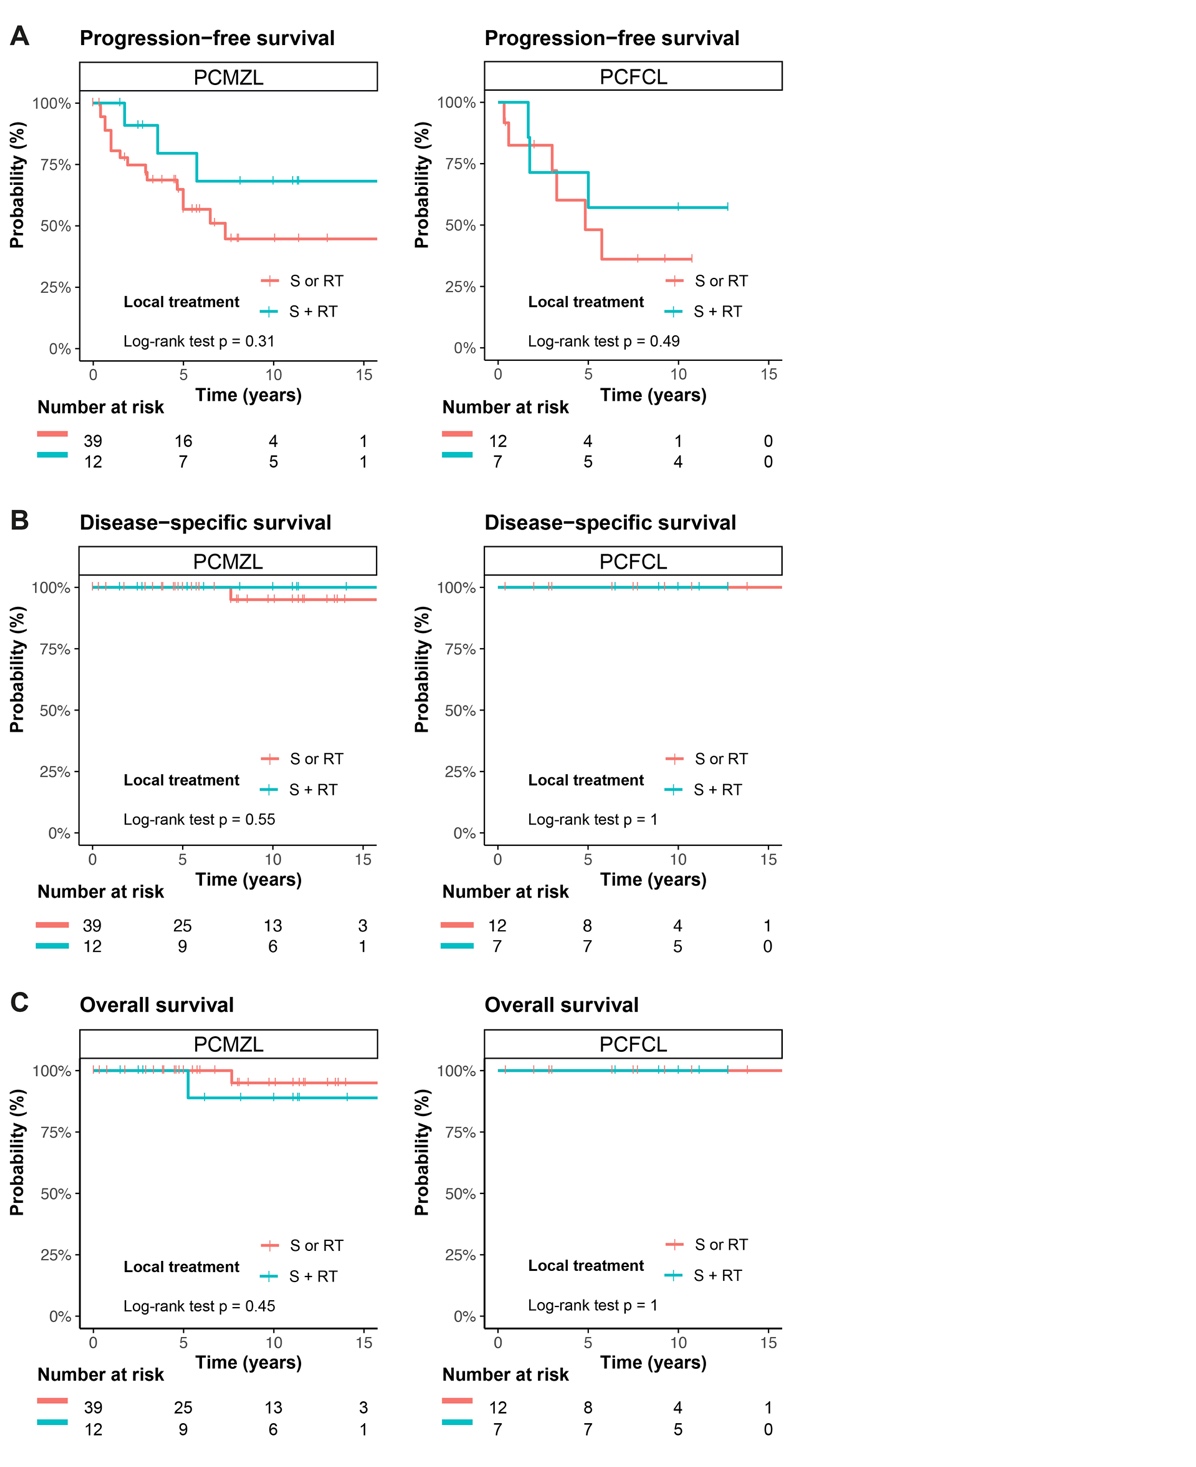


**Figure S2**: K‒M survival curves for patients who received local treatment (strata) and by tumour histology (columnwise). **A**, progression-free survival; **B**, disease-specific survival; **C**, overall survival.


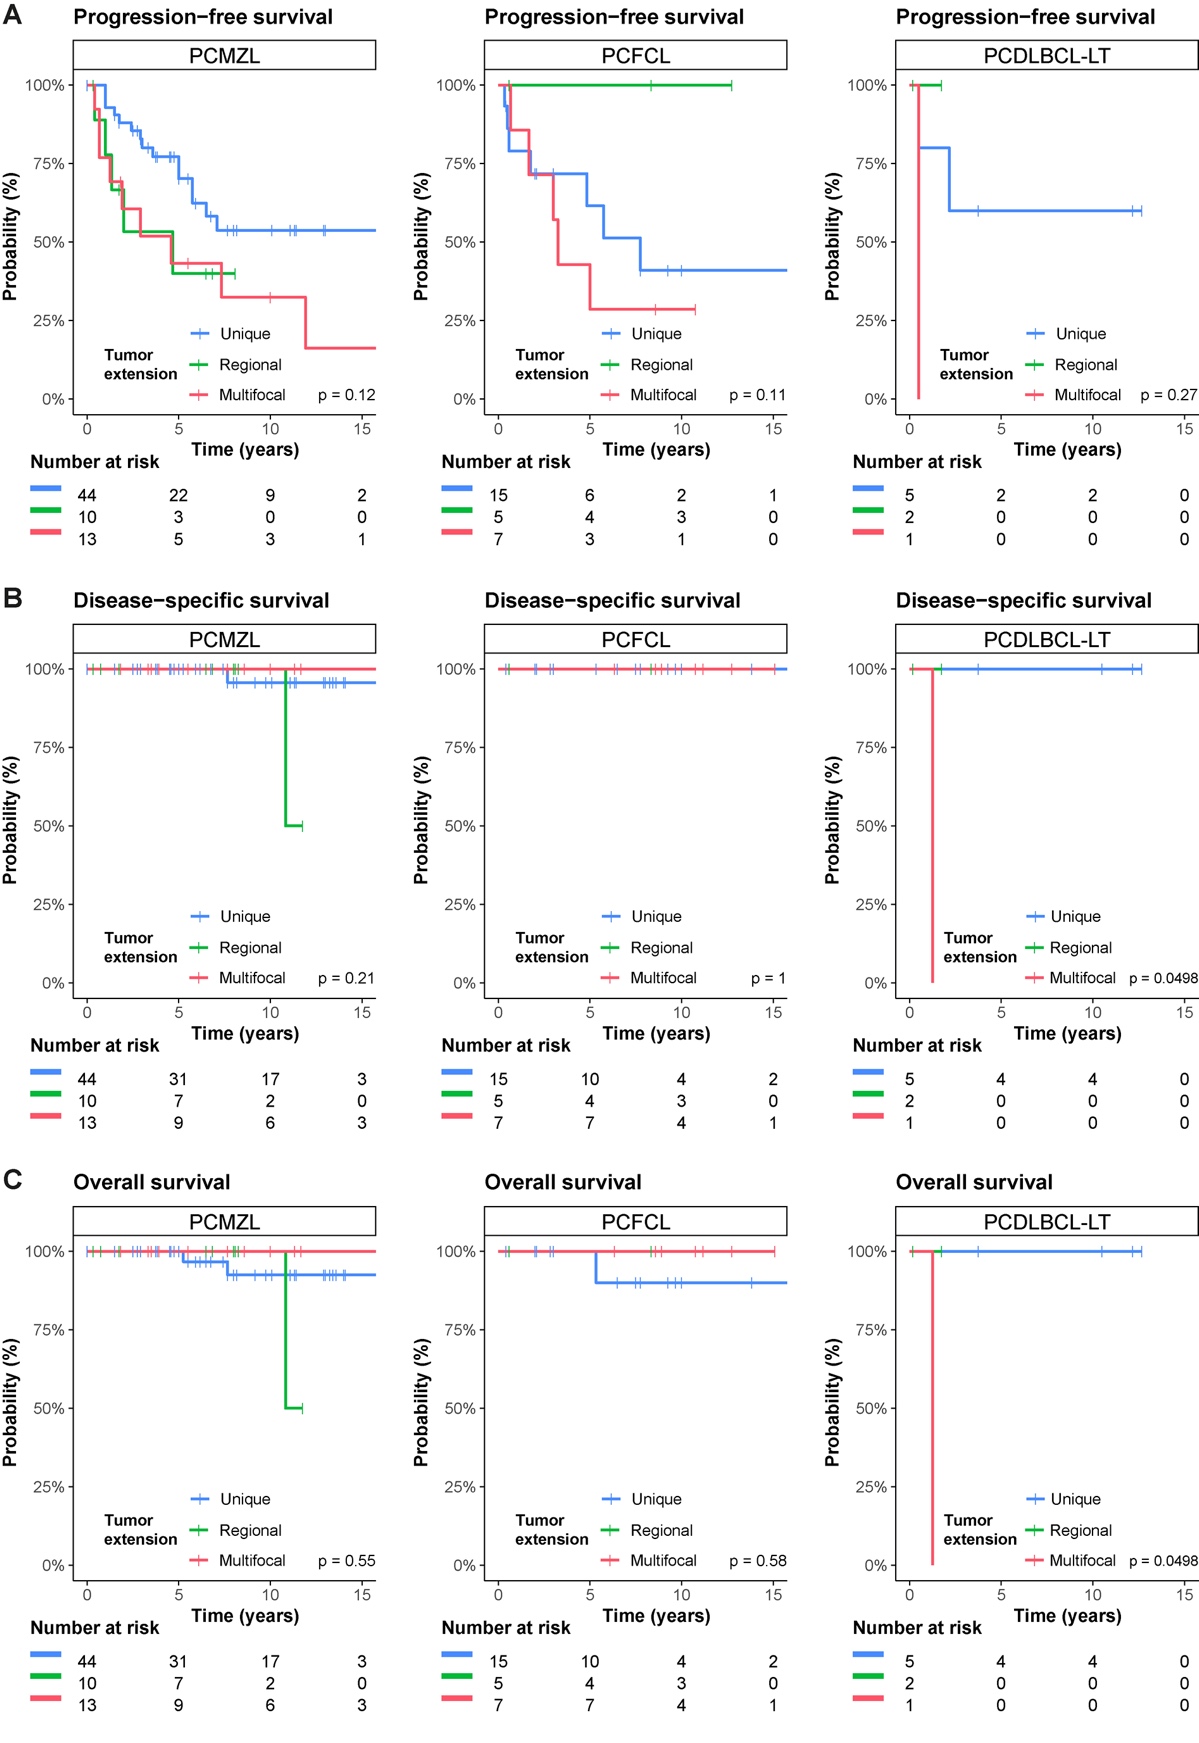


**Figure S3**: Kaplan‒Meier survival curves according to tumour histology (columnwise) and tumour extension. **A**, progression-free survival; **B**, disease-specific survival; **C**, overall survival.
